# Supplementary material for: Assessment of Phycocyanin Extraction from Cyanidium caldarium by Spark Discharges, Compared to Freeze-Thaw Cycles, Sonication, and Pulsed Electric Fields
Source: MDPI journal article supplement (doi:10.3390/microorganisms9071452), 2021-07-06
Supplement: s1 [file s1]

## Supplementary Materials

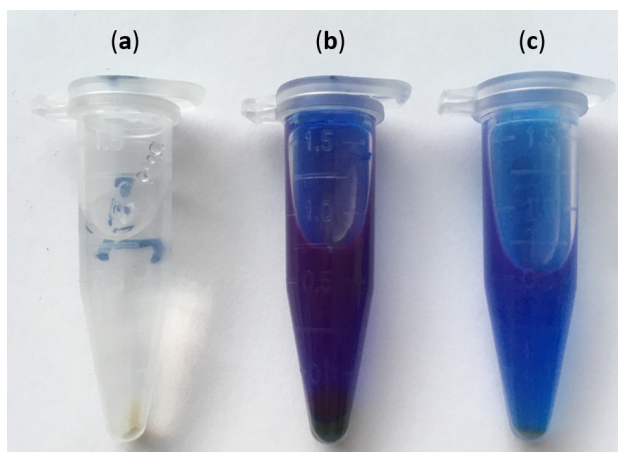

**Figure S1.** Pictures of raw extracts obtained by freeze-thaw cycles (a), sonication (b), and spark discharges (c).
